# Supplementary material
Source: PubMed Central journal article supplement (PMC5136488)

# Supplementary Figure S2

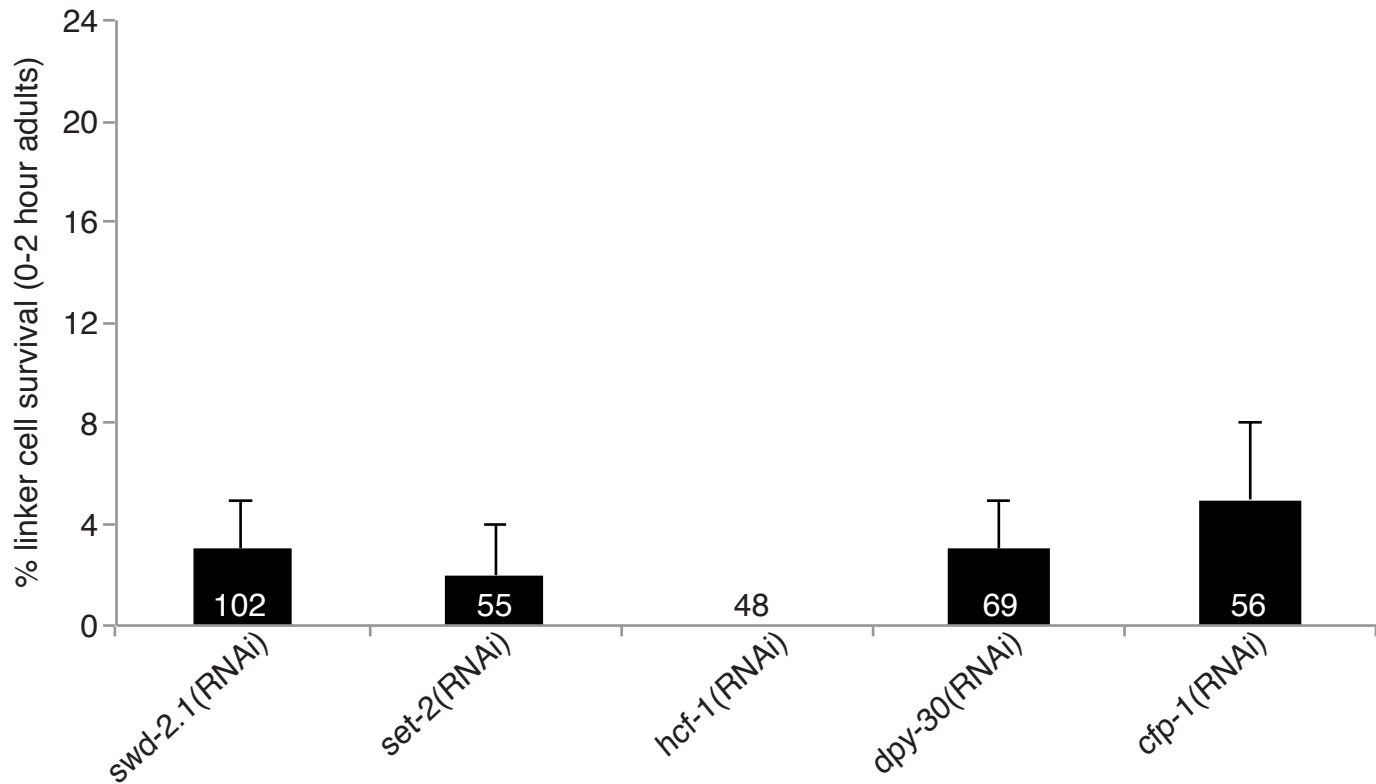

Supplement: cdd201677x2.pdf [file cdd201677x2.pdf]

# Supplementary figure S3

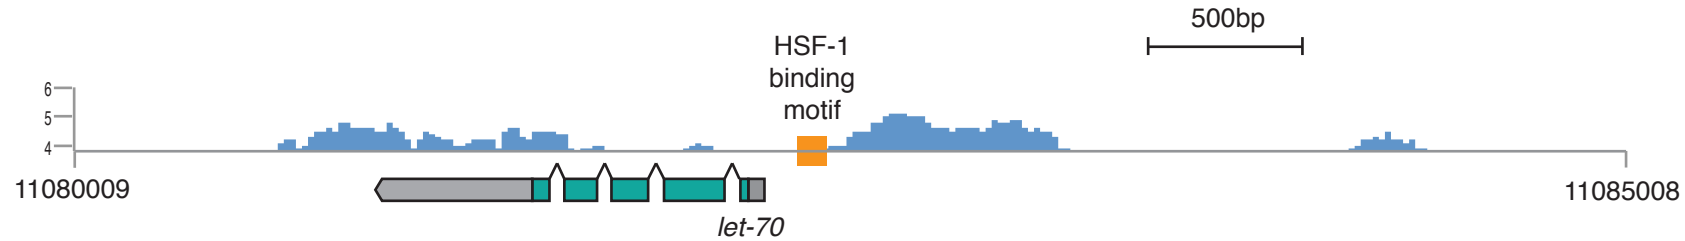

Supplement: cdd201677x3.pdf [file cdd201677x3.pdf]
